# Supplementary material for: Complex Genomic Rearrangements at the PLP1 Locus Include Triplication and Quadruplication
Source: PubMed Central journal article supplement (PMC4352052; doi:10.1371/journal.pgen.1005050), 2015-03-06
Supplement: pgen.1005050.s004.pdf [file pgen.1005050.s004.pdf]

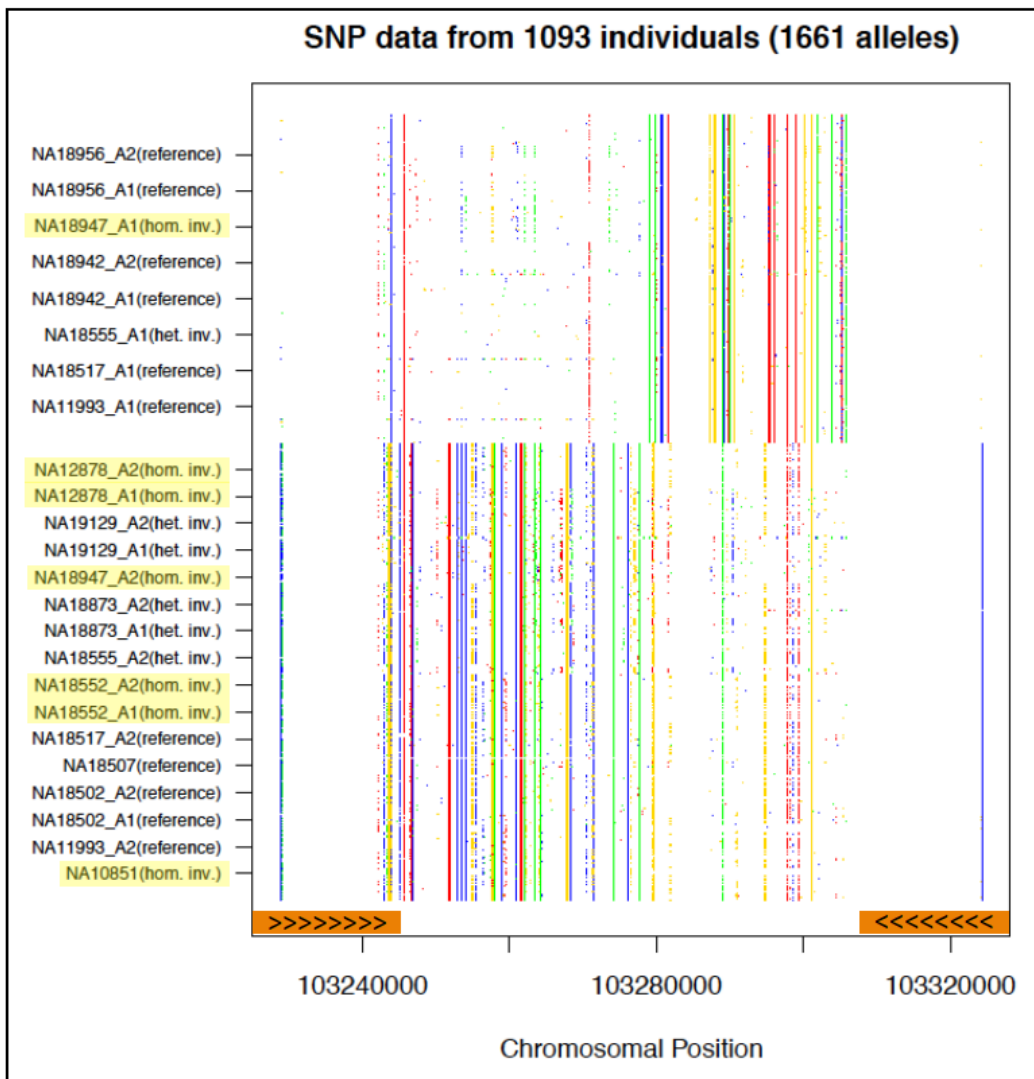

**Figure S4- Inversions Between A1a and A1b LCRs Appear to be Recurrent**
