# Supplementary material for: Complex Genomic Rearrangements at the PLP1 Locus Include Triplication and Quadruplication
Source: PubMed Central journal article supplement (PMC4352052; doi:10.1371/journal.pgen.1005050), 2015-03-06
Supplement: pgen.1005050.s014.pdf [file pgen.1005050.s014.pdf]

| Patient                     | CA-PLP2/3<br>CA repeat | c.5-411T>C | c.5-111T>C | c.609T>C | 839M11-F24/R24<br>A/C | 839M11-F25/R25<br>A/C | 839M11-F26/R26<br>A/G | U240C2-F19/R19<br>T/A | U240C2-F20/R20<br>G/A | U240C2-F21/R21<br>T/G | U240C2-F18/R18<br>CA repeat |
|-----------------------------|------------------------|------------|------------|----------|-----------------------|-----------------------|-----------------------|-----------------------|-----------------------|-----------------------|-----------------------------|
| P0250                       | 182bp                  | C          | C          | T        | C                     | C                     | G                     | T                     | G                     | T                     | 214/18                      |
| P0255/P0298                 | 192bp                  | T          | C          | T        | C                     | C                     | G                     | T                     | G                     | T                     | 212/17                      |
| P0374*                      | ND                     | ND         | ND         | ND       | C                     | C                     | G                     | T                     | G                     | T                     | 219/21;223/23               |
| P0500                       | 180bp                  | C          | C          | C        | C                     | C                     | G                     | T                     | G                     | T                     | 216/19                      |
| P0518                       | 182bp                  | T          | T          | T        | C                     | C                     | G                     | T                     | G                     | T                     | 216/19                      |
| P0558                       | 184bp                  | C          | C          | C        | A                     | A                     | A                     | A                     | A                     | G                     | 216/19                      |
| P0642                       | 180bp                  | C          | C          | C        | C                     | C                     | G                     | T                     | G                     | T                     | 212/17                      |
| P0674                       | 182bp                  | T          | T          | T        | A                     | A                     | A                     | A                     | A                     | G                     | 216/19                      |
| P0820                       | 182bp                  | T          | T          | T        | C                     | C                     | G                     | T                     | G                     | T                     | 216/19                      |
| P0842                       | 184bp                  | T          | T          | T        | A                     | A                     | A                     | A                     | A                     | G                     | 216/19                      |
| P1150                       | 182bp                  | T          | T          | T        | C                     | C                     | G                     | T                     | G                     | T                     | 216/19                      |
| P1389                       | 192bp                  | T          | T          | T        | A                     | A                     | A                     | A                     | A                     | G                     | 216/19                      |
| P1407                       | 180bp                  | C          | C          | C        | A                     | A                     | A                     | A                     | A                     | G                     | 216/19                      |
|                             |                        |            |            |          |                       |                       |                       |                       |                       |                       | bp/repeats                  |
| position on<br>NT_011051.17 | 26331677               | 26336408   | 26336708   | 26339190 | 26548289              | 26557893              | 26570534              | 26577150              | 26584297              | 26591851              | 26590136                    |

\* P0374 is not duplicated at PLP1, so no analysis was done in the PLP1 region.

**Table S3- Results of SNP and STR Genotyping**
