# Supplementary material for: Complex Genomic Rearrangements at the PLP1 Locus Include Triplication and Quadruplication
Source: PubMed Central journal article supplement (PMC4352052; doi:10.1371/journal.pgen.1005050), 2015-03-06
Supplement: pgen.1005050.s015.pdf [file pgen.1005050.s015.pdf]

| <b>Blot from Figure 3B</b> |               |              |                   |              |
|----------------------------|---------------|--------------|-------------------|--------------|
| <b>Individual</b>          | <b>Lane #</b> | <b>Band#</b> | <b>Raw Volume</b> | <b>Ratio</b> |
| NA15510                    | 1             | 1            | 43                | 1.05         |
|                            | 1             | 2            | 41                |              |
| NA10851                    | 2             | 1            | 75                | NA           |
| BAB1290                    | 3             | 1            | 91                | 2.17         |
| H2                         | 3             | 2            | 42                |              |
| BAB1612                    | 4             | 1            | 50                | 2.38         |
| H2                         | 4             | 2            | 21                |              |
| <b>Blot from Figure 3C</b> |               |              |                   |              |
| <b>Individual</b>          | <b>Lane #</b> | <b>Band#</b> | <b>Raw Volume</b> | <b>Ratio</b> |
| NA15510                    | 1             | 1            | 516               | 1.24         |
|                            | 1             | 2            | 417               |              |
| BAB2389                    | 2             | 1            | 865               | 2.21         |
| H2                         | 2             | 2            | 391               |              |
| BAB4179                    | 3             | 1            | 1011              | NA           |
| BAB3700                    | 4             | 1            | 584               | 1.21         |
|                            | 4             | 2            | 483               |              |
| BAB3698                    | 5             | 1            | 1145              | 2.23         |
| H2                         | 5             | 2            | 512               |              |
| BAB3699                    | 6             | 1            | 549               | 1.06         |
|                            | 6             | 2            | 516               |              |
| <b>Blot from Figure 3D</b> |               |              |                   |              |
| <b>Individual</b>          | <b>Lane #</b> | <b>Band#</b> | <b>Raw Volume</b> | <b>Ratio</b> |
| NA15510                    | 1             | 1            | 74                | 0.81         |
|                            | 1             | 2            | 91                |              |
| P250                       | 2             | 1            | 54                | 0.13         |
| H1                         | 2             | 2            | 426               |              |
| P298                       | 3             | 1            | 117               | 0.45         |
| H1                         | 3             | 2            | 261               |              |
| P500                       | 4             | 1            | 181               | 1.92         |
| H2                         | 4             | 2            | 94                |              |
| P518                       | 5             | 1            | 122               | 1.87         |
| H2                         | 5             | 2            | 65                |              |
| P558                       | 6             | 1            | 41                | 0.32         |
| H1                         | 6             | 2            | 129               |              |
| P642                       | 7             | 1            | 82                | 1.74         |
| H2                         | 7             | 2            | 47                |              |

**Table S4- Semi-Quantitative Analysis of Patient Southern Blots**
