# Supplementary material for: Complex Genomic Rearrangements at the PLP1 Locus Include Triplication and Quadruplication
Source: PLOS journal article supplement (doi:10.1371/journal.pgen.1005050), 2015-03-06
Supplement: S11 (10.1371/journal.pgen.1005050.s011) [file journal.pgen.1005050.s011]

**A**

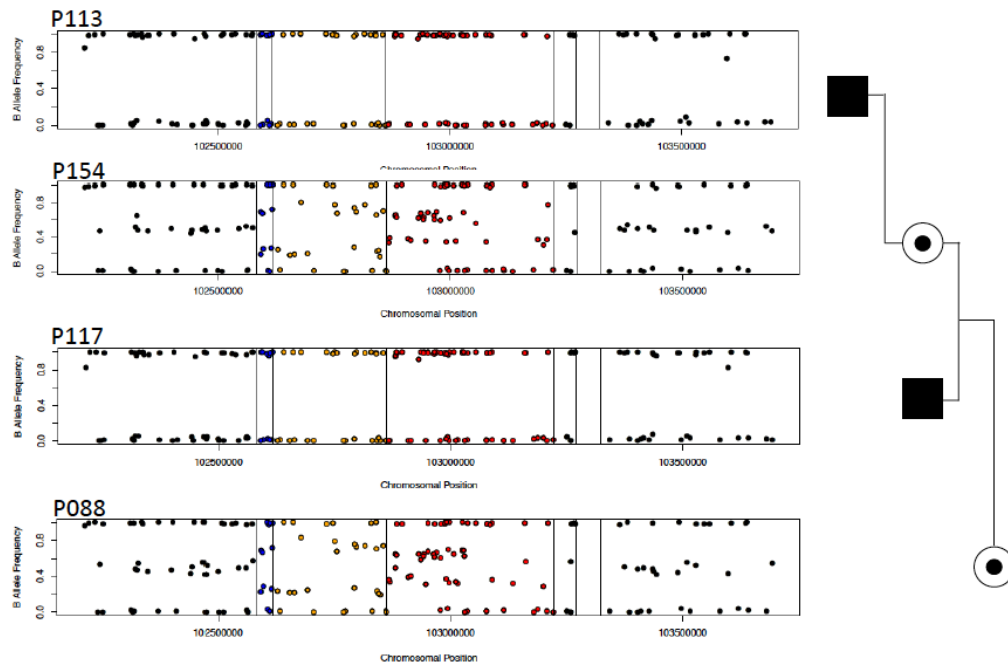

**B**

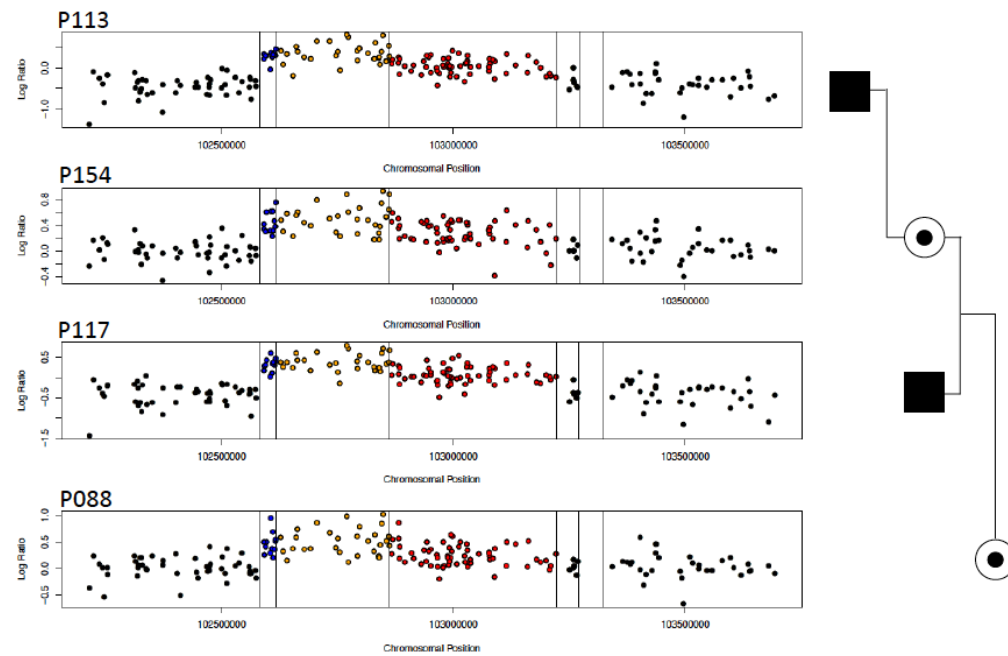

**Figure S11- SNP Array Results for Quadruplication**
